# Supplementary material for: Collagen-derived proline promotes pancreatic ductal adenocarcinoma cell survival under nutrient limited conditions
Source: PubMed Central journal article supplement (PMC5504351; doi:10.1038/ncomms16031), 2017-07-07
Supplement: ncomms16031-s1.pdf [file ncomms16031-s1.pdf]

Title of file for HTML: Supplementary Information

Description: Supplementary Figures and Supplementary Tables

Title of file for HTML: Supplementary Data 1

Description: Complete mass isotopomer distribution of data displayed in Fig 6d and Fig S7d from U-<sup>13</sup>C-proline after 24hrs. All data are presented as mean  $\pm$  SEM. n=3 replicates per condition. M0 represents unlabelled molecules with each increasing number representing additional <sup>13</sup>C-labelled carbons.



## Normal pancreas

## PDAC

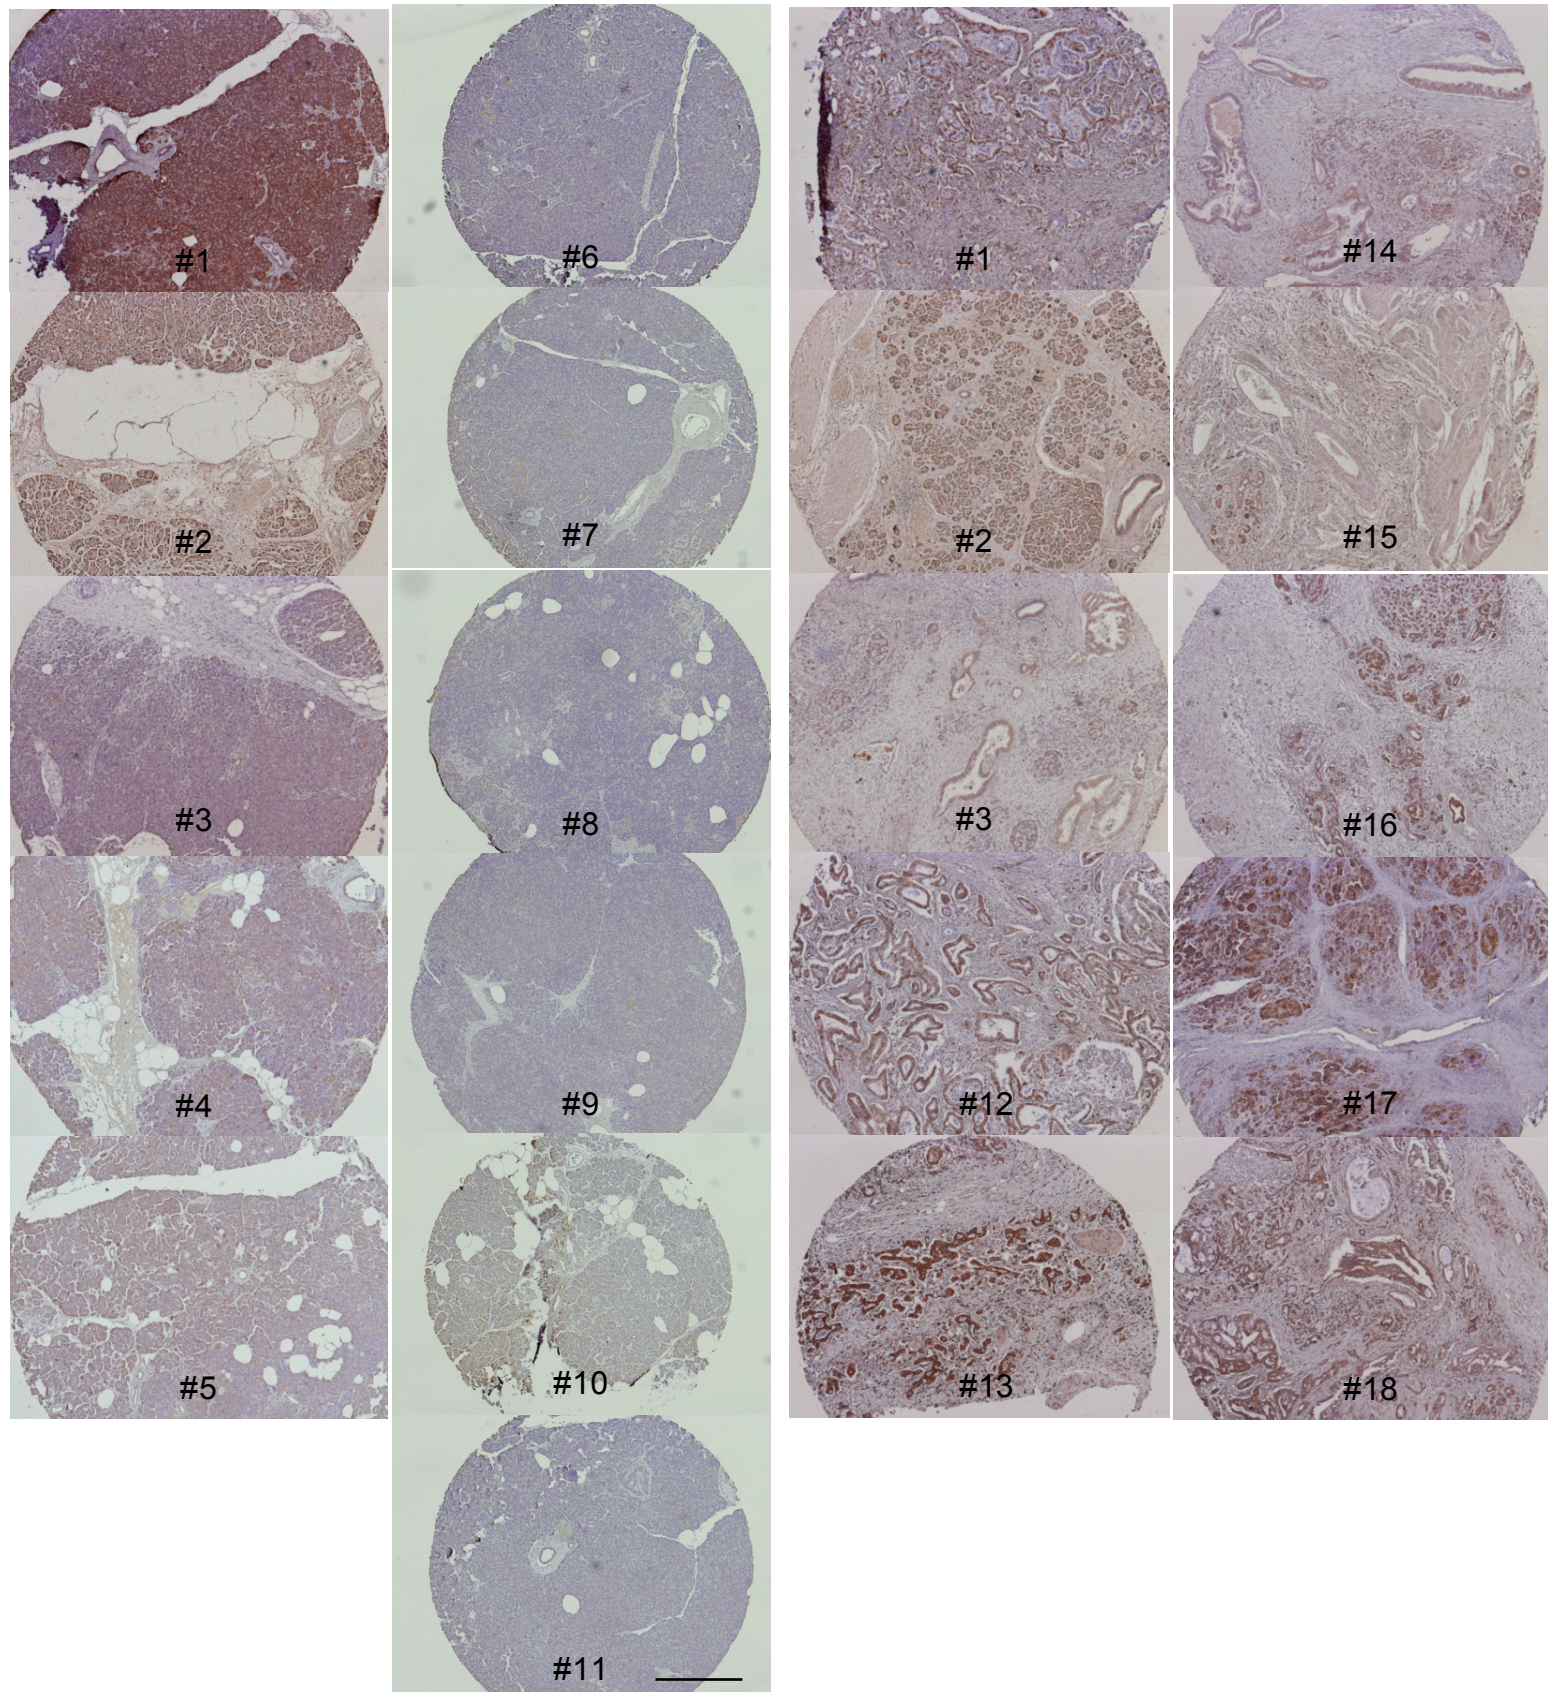**Supplementary Figure 1**

**PRODHI is expressed in human PDAC samples.** Staining of PRODHI by IHC on human tissue macroarray (TMA) containing PDAC (n=10), adjacent normal pancreas (n=3, #1 to #3) and normal pancreas from PDAC-free patients (n=8, #4 to #11). Quantification of PRODHI expression in TMA samples was determined by densitometry using Image J software (NIH) with the same threshold for all images. Scale bar: 500  $\mu$ m.



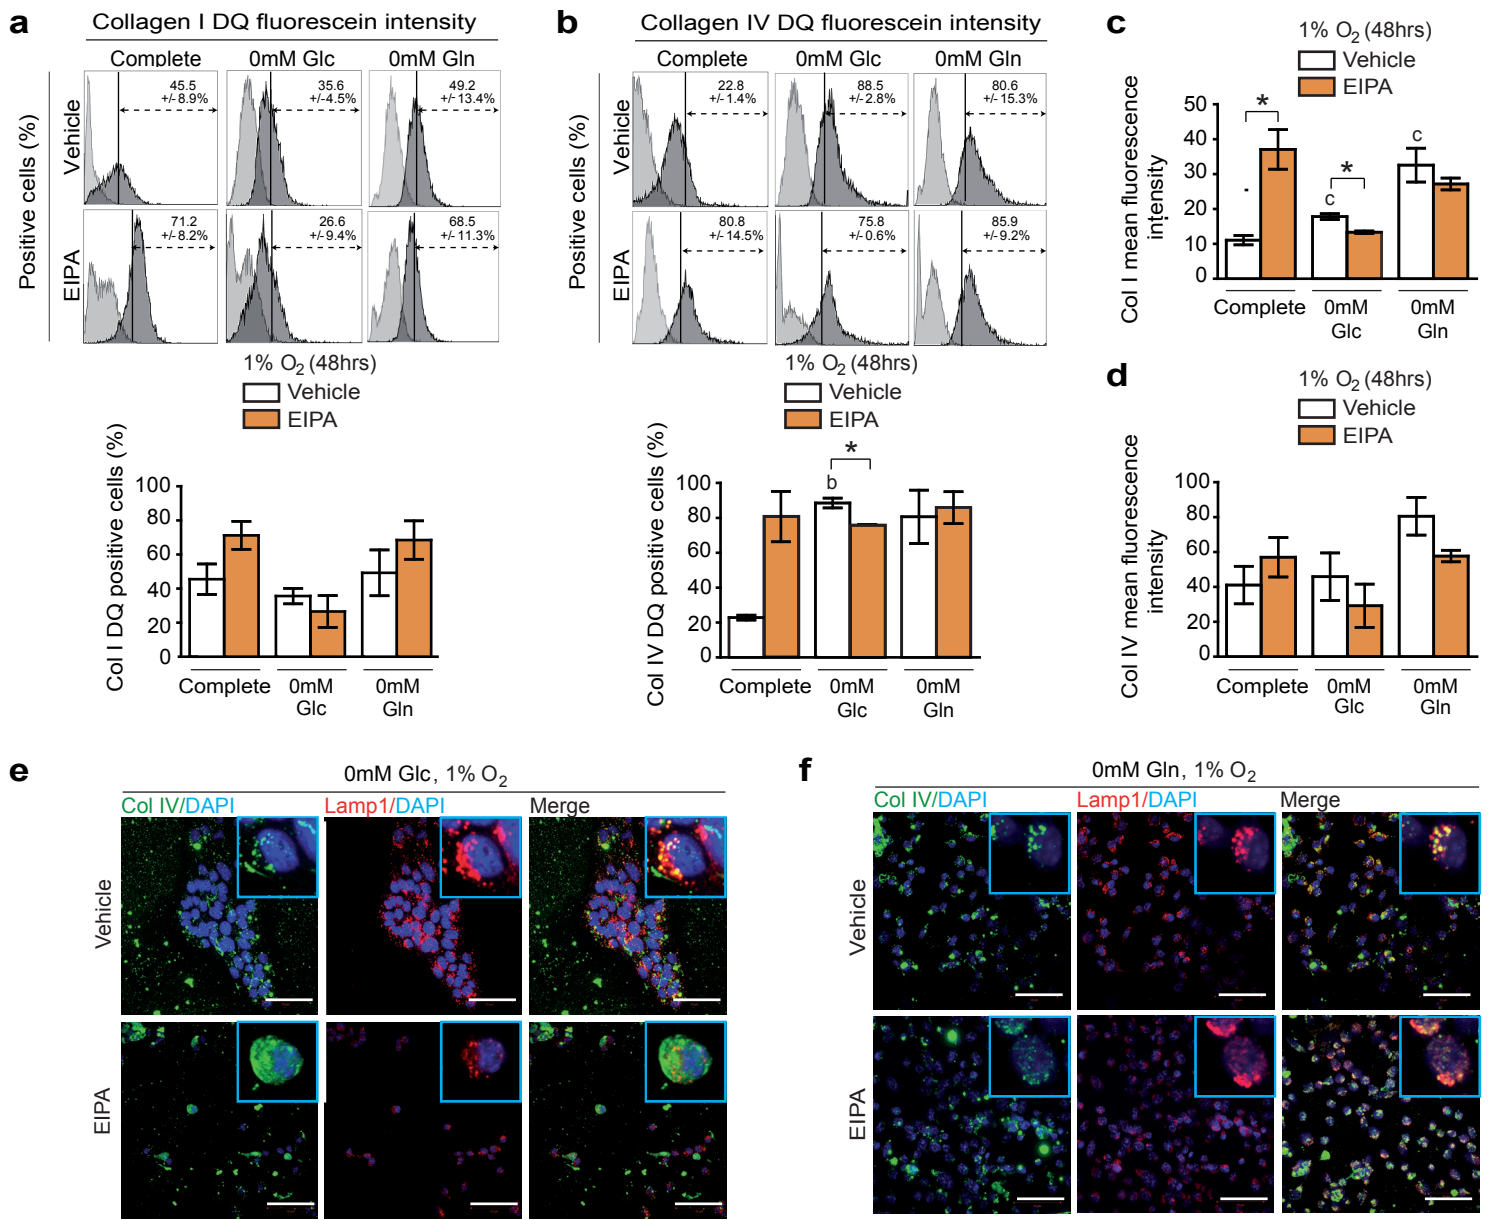

## Supplementary Figure 2

**PDAC cells take up and degrade collagen after glucose or glutamine deprivation under hypoxia.** (a) and (b) Representative flow cytometry profiles (upper panels) and charts (lower panels) representing the percentage of PK4A cells taking up collagen I (a) or IV (b) DQ. Mean (c) Col I or (d) Col IV DQ fluorescence intensity (MFI) in PK4A cells cultured during 48hrs under hypoxia (1% O<sub>2</sub>) as in Fig. 3a-b. Data represent mean ± SEM (n=3 independent experiments). P values, indicated by asterisks, show statistical significance relative to respective culture condition without EIPA (\* p<0.05), while letters indicate statistical significance relative to complete media without EIPA (<sup>c</sup> p<0.05, <sup>b</sup> p<0.01). Two-tailed unpaired Student's t-test. (e) and (f) Representative co-staining of Col IV DQ and Lamp1 lysosomal marker in PK4A cells cultured in glucose-free (e) or glutamine-free (f) media under hypoxic conditions with or without EIPA. Insets show magnification of Col IV, Lamp1 or Col IV/Lamp1 (merge) PK4A cells in each condition. Images are representative of n=3 independent experiments. Scale bar: 50 μm.

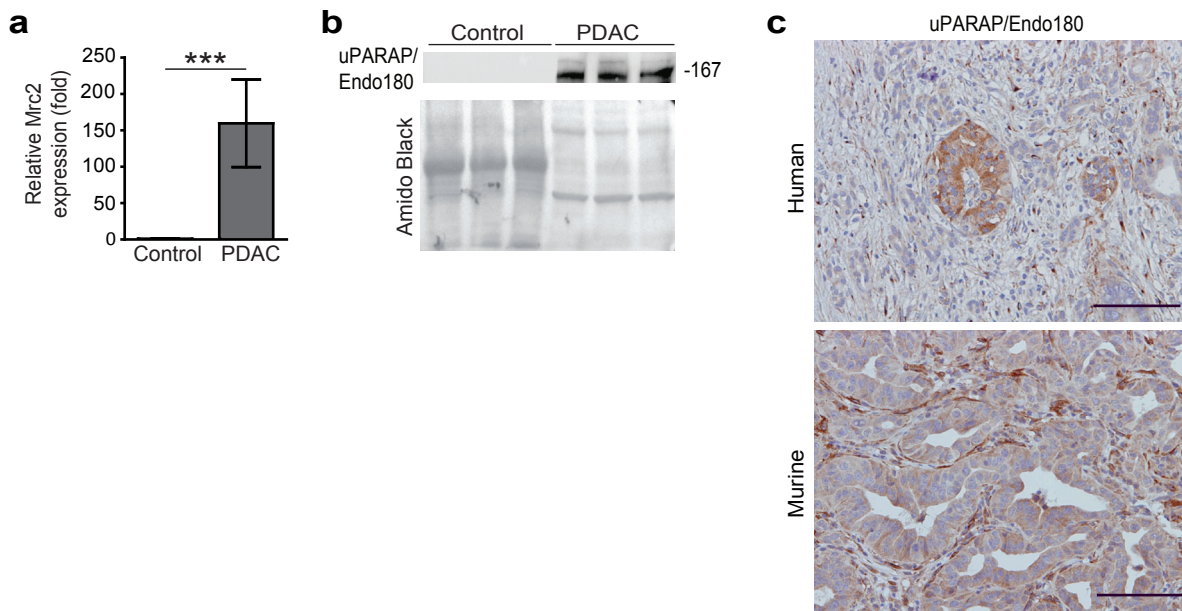

### Supplementary Figure 3

**MRC2/Endo180 is expressed by PDAC tumour cells.** (a) mRNA levels of the receptor uPARAP/Endo180 (Mrc2 gene) measured by quantitative RT-PCR in PDAC from PK1 mice (n=3) versus control pancreases from KI mice (n=3). Data are presented as mean  $\pm$  SEM. \*\*\*  $p < 0.001$ ; two-tailed unpaired Student's t-test. (b) Protein levels of uPARAP/Endo180 in PDAC and control pancreas from PK1 and KI mice, respectively (upper panel). Marker size in kDa is indicated. Total protein stained with Amido black were used as loading control (lower panel). Uncropped images of blots are shown in Supplementary Fig. 10. (c) Representative uPARAP/Endo180 staining in human and murine PDAC sections (n=4 patients and n=3 PK1 mice). Scale bar: 100  $\mu$ m.

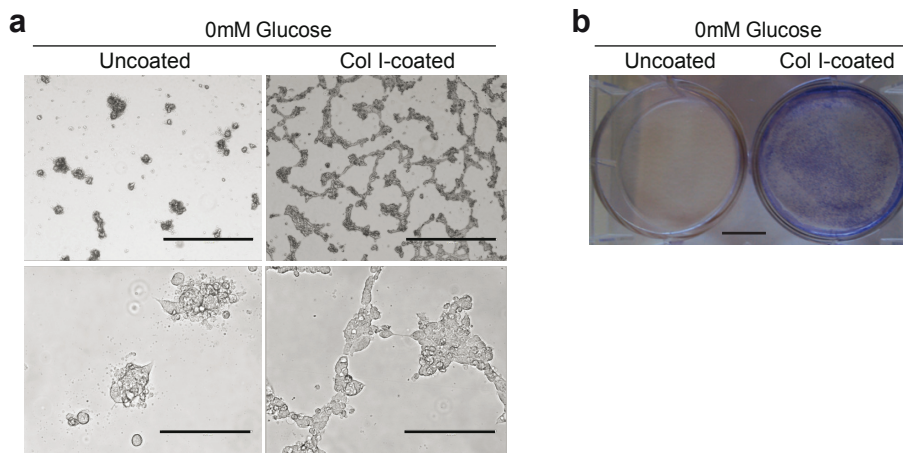

#### Supplementary Figure 4

**Collagen promotes PDAC cell survival.** (a) and (b) Survival of PK4A cells cultured in glucose-free media on uncoated or coated-collagen I plates. Representative images of unstained cells (a) and cells stained with crystal violet (b) after 96hrs of treatment (n=2 independent experiments). Scale bar: 1,000  $\mu$ m (a: upper images), 200  $\mu$ m (a: lower images) and 5 mm (b).

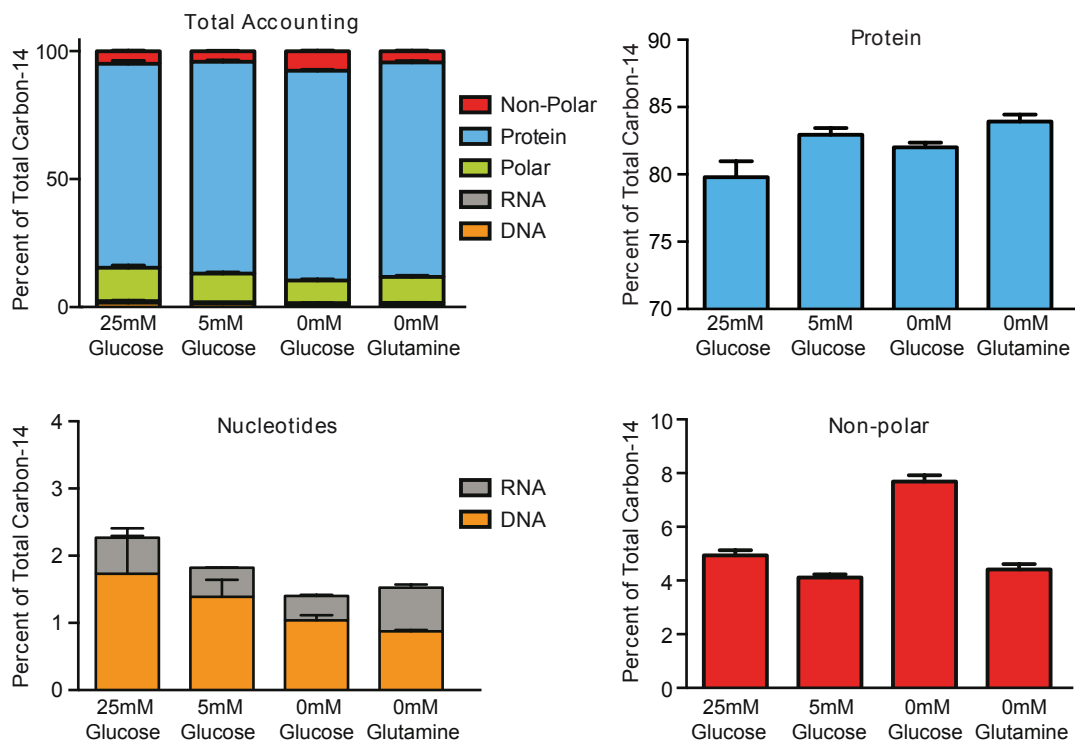

### Supplementary Figure 5

**Accounting of proline-derived carbon contributions to different cellular macromolecules.** Relative contributions of proline to proteins, nucleotides (RNA, DNA) and non-polar (lipids) fractions determined under different nutrient conditions. Each bar represents the average of n=3 biological replicates  $\pm$  SEM.

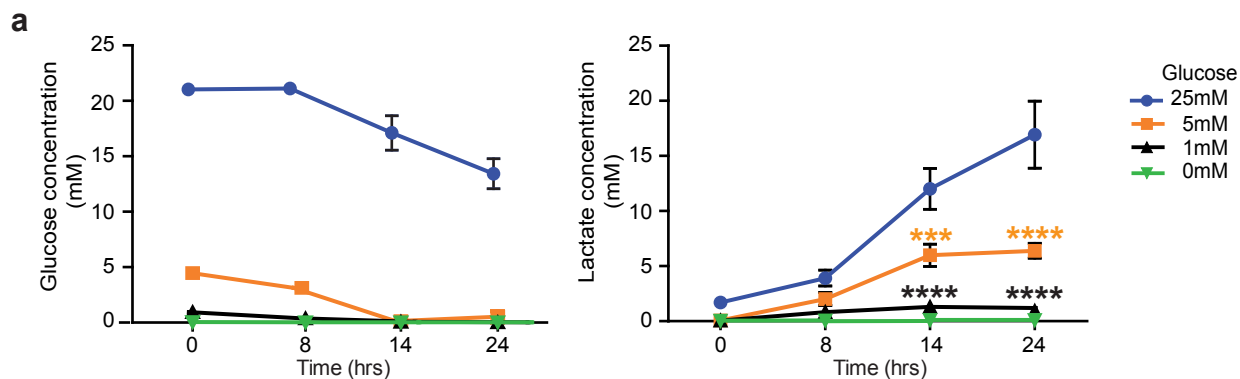

**b**

| Time      | 1hr    |        |        | 3hrs   |        |        | 6hrs   |        |        | 24hrs  |        |        |
|-----------|--------|--------|--------|--------|--------|--------|--------|--------|--------|--------|--------|--------|
|           | 4mM    | 2mM    | 0.5mM  | 4mM    | 2mM    | 0.5mM  | 4mM    | 2mM    | 0.5mM  | 4mM    | 2mM    | 0.5mM  |
| <b>M0</b> | 0.1694 | 0.1822 | 0.2179 | 0.1440 | 0.1487 | 0.1440 | 0.1015 | 0.1024 | 0.1221 | 0.0399 | 0.0357 | 0.0457 |
| SEM       | 0.0099 | 0.0041 | 0.0416 | 0.0148 | 0.0110 | 0.0145 | 0.0163 | 0.0082 | 0.0058 | 0.0007 | 0.0014 | 0.0021 |
| <b>M1</b> | 0.0019 | 0.0015 | 0.0022 | 0.0022 | 0.0027 | 0.0026 | 0.0032 | 0.0027 | 0.0032 | 0.0042 | 0.0041 | 0.0033 |
| SEM       | 0.0004 | 0.0007 | 0.0006 | 0.0006 | 0.0004 | 0.0001 | 0.0003 | 0.0003 | 0.0001 | 0.0001 | 0.0001 | 0.0001 |
| <b>M2</b> | 0.0233 | 0.0227 | 0.0220 | 0.0248 | 0.0237 | 0.0244 | 0.0264 | 0.0262 | 0.0259 | 0.0296 | 0.0296 | 0.0278 |
| SEM       | 0.0004 | 0.0011 | 0.0011 | 0.0006 | 0.0003 | 0.0007 | 0.0007 | 0.0009 | 0.0005 | 0.0003 | 0.0001 | 0.0003 |
| <b>M3</b> | 0.8092 | 0.7972 | 0.7603 | 0.8315 | 0.8288 | 0.8317 | 0.8717 | 0.8724 | 0.8532 | 0.9283 | 0.9327 | 0.9269 |
| SEM       | 0.0094 | 0.0036 | 0.0398 | 0.0142 | 0.0104 | 0.0149 | 0.0155 | 0.0073 | 0.0055 | 0.0004 | 0.0017 | 0.0023 |

### Supplementary Figure 6

**Glutamine depletion does not change relative glucose contribution to lactate production.** (a) Glucose uptake (left panel) and lactate production (right panel) by subconfluent PK4A cells cultured under gradual glucose deprivation (25mM, 5mM, 1mM and 0mM) at 8, 14 and 24hrs. Data are mean  $\pm$  SEM, n=4 independent experiments. P value indicated by asterisks is relative to lactate value in 25mM glucose media at each time point. \*\*\* p< 0.001, \*\*\*\* p< 0.0001; two-way ANOVA followed by Bonferroni post-hoc test. (b) Complete mass isotopomer distribution (MID) of lactate from U-13C-glucose at 1, 3, 6 and 24hrs under a gradual decline in glutamine concentration. All data are presented as mean  $\pm$  SEM. n=3 replicates per condition.





a

## Proline

| Time      | 25mM Glucose + 4mM Gln |         | 5mM Glucose + 4mM Gln |         | 0mM Glucose + 4mM Gln |         | 25mM Glucose + 0mM Gln |         |
|-----------|------------------------|---------|-----------------------|---------|-----------------------|---------|------------------------|---------|
|           | 21%                    | 1%      | 21%                   | 1%      | 21%                   | 1%      | 21%                    | 1%      |
| <b>M0</b> | 0.0850                 | 0.1014  | 0.1292                | 0.1671  | 0.1213                | 0.0947  | 0.0284                 | 0.0294  |
| SEM       | 0.0024                 | 0.0014  | 0.0014                | 0.0027  | 0.0017                | 0.0023  | 0.0006                 | 0.0007  |
| <b>M1</b> | -0.0018                | -0.0023 | -0.0030               | -0.0039 | -0.0019               | -0.0017 | -0.0001                | -0.0003 |
| SEM       | 0.0002                 | 0.0000  | 0.0002                | 0.0002  | 0.0001                | 0.0001  | 0.0001                 | 0.0001  |
| <b>M2</b> | 0.0007                 | 0.0008  | 0.0009                | 0.0007  | 0.0012                | 0.0006  | 0.0005                 | 0.0004  |
| SEM       | 0.0001                 | 0.0000  | 0.0001                | 0.0001  | 0.0000                | 0.0002  | 0.0001                 | 0.0000  |
| <b>M3</b> | 0.0056                 | 0.0053  | 0.0055                | 0.0051  | 0.0062                | 0.0057  | 0.0059                 | 0.0060  |
| SEM       | 0.0000                 | 0.0001  | 0.0001                | 0.0000  | 0.0002                | 0.0001  | 0.0001                 | 0.0000  |
| <b>M4</b> | 0.0406                 | 0.0396  | 0.0386                | 0.0368  | 0.0388                | 0.0397  | 0.0429                 | 0.0424  |
| SEM       | 0.0002                 | 0.0002  | 0.0002                | 0.0002  | 0.0002                | 0.0003  | 0.0000                 | 0.0003  |
| <b>M5</b> | 0.8845                 | 0.8707  | 0.8435                | 0.8092  | 0.8503                | 0.8766  | 0.9401                 | 0.9389  |
| SEM       | 0.0019                 | 0.0011  | 0.0012                | 0.0025  | 0.0023                | 0.0026  | 0.0010                 | 0.0006  |

## Glutamate

| Time      | 25mM Glucose + 4mM Gln |         | 5mM Glucose + 4mM Gln |        | 0mM Glucose + 4mM Gln |         | 25mM Glucose + 0mM Gln |        |
|-----------|------------------------|---------|-----------------------|--------|-----------------------|---------|------------------------|--------|
|           | 21%                    | 1%      | 21%                   | 1%     | 21%                   | 1%      | 21%                    | 1%     |
| <b>M0</b> | 0.9664                 | 0.9815  | 0.9793                | 0.9916 | 0.9408                | 0.9794  | 0.6268                 | 0.6386 |
| SEM       | 0.0006                 | 0.0006  | 0.0004                | 0.0000 | 0.0013                | 0.0008  | 0.0004                 | 0.0043 |
| <b>M1</b> | 0.0025                 | -0.0010 | 0.0028                | 0.0003 | 0.0059                | -0.0012 | 0.0465                 | 0.0301 |
| SEM       | 0.0005                 | 0.0003  | 0.0003                | 0.0005 | 0.0002                | 0.0003  | 0.0007                 | 0.0023 |
| <b>M2</b> | 0.0017                 | -0.0004 | 0.0007                | 0.0002 | 0.0081                | 0.0023  | 0.0361                 | 0.0375 |
| SEM       | 0.0002                 | 0.0001  | 0.0003                | 0.0003 | 0.0002                | 0.0002  | 0.0010                 | 0.0034 |
| <b>M3</b> | 0.0069                 | 0.0013  | 0.0036                | 0.0002 | 0.0101                | 0.0034  | 0.0968                 | 0.0819 |
| SEM       | 0.0001                 | 0.0001  | 0.0001                | 0.0001 | 0.0003                | 0.0002  | 0.0003                 | 0.0007 |
| <b>M4</b> | 0.0010                 | 0.0009  | 0.0006                | 0.0004 | 0.0016                | 0.0007  | 0.0075                 | 0.0090 |
| SEM       | 0.0000                 | 0.0000  | 0.0000                | 0.0001 | 0.0001                | 0.0001  | 0.0002                 | 0.0007 |
| <b>M5</b> | 0.0215                 | 0.0179  | 0.0131                | 0.0073 | 0.0338                | 0.0154  | 0.1888                 | 0.2064 |
| SEM       | 0.0002                 | 0.0001  | 0.0001                | 0.0002 | 0.0006                | 0.0005  | 0.0001                 | 0.0010 |

## αKG

| Time      | 25mM Glucose + 4mM Gln |         | 5mM Glucose + 4mM Gln |         | 0mM Glucose + 4mM Gln |         | 25mM Glucose + 0mM Gln |         |
|-----------|------------------------|---------|-----------------------|---------|-----------------------|---------|------------------------|---------|
|           | 21%                    | 1%      | 21%                   | 1%      | 21%                   | 1%      | 21%                    | 1%      |
| <b>M0</b> | 0.9799                 | 0.9859  | 0.9887                | 0.9954  | 0.9536                | 0.9836  | 0.6832                 | 0.6968  |
| SEM       | 0.0029                 | 0.0013  | 0.0016                | 0.0014  | 0.0034                | 0.0008  | 0.0030                 | 0.0170  |
| <b>M1</b> | 0.0034                 | -0.0022 | -0.0007               | -0.0027 | 0.0075                | 0.0035  | 0.0449                 | 0.0210  |
| SEM       | 0.0032                 | 0.0009  | 0.0023                | 0.0014  | 0.0016                | 0.0022  | 0.0055                 | 0.0086  |
| <b>M2</b> | 0.0030                 | 0.0012  | 0.0009                | 0.0006  | 0.0115                | 0.0042  | 0.0269                 | 0.0373  |
| SEM       | 0.0025                 | 0.0007  | 0.0013                | 0.0003  | 0.0033                | 0.0017  | 0.0046                 | 0.0039  |
| <b>M3</b> | 0.0029                 | 0.0002  | 0.0031                | 0.0007  | 0.0064                | 0.0015  | 0.0939                 | 0.0777  |
| SEM       | 0.0005                 | 0.0004  | 0.0002                | 0.0005  | 0.0012                | 0.0010  | 0.0012                 | 0.0023  |
| <b>M4</b> | -0.0040                | 0.0000  | -0.0016               | 0.0000  | -0.0038               | -0.0037 | -0.0149                | -0.0088 |
| SEM       | 0.0006                 | 0.0002  | 0.0005                | 0.0002  | 0.0013                | 0.0003  | 0.0039                 | 0.0047  |
| <b>M5</b> | 0.0194                 | 0.0174  | 0.0125                | 0.0072  | 0.0326                | 0.0142  | 0.1976                 | 0.2079  |
| SEM       | 0.0006                 | 0.0002  | 0.0001                | 0.0005  | 0.0013                | 0.0009  | 0.0073                 | 0.0032  |

b

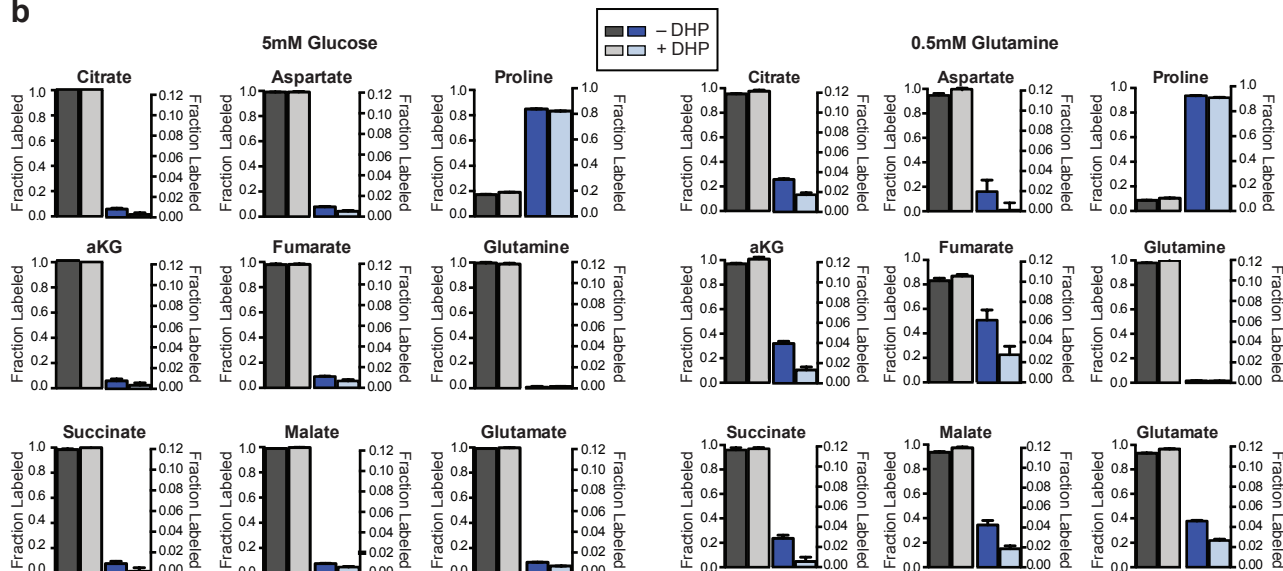

## Supplementary Figure 8

Hypoxia does not influence proline conversion to glutamate or alpha-ketoglutarate but DHP inhibits metabolism of proline to TCA.

(a) Complete mass isotopomer distribution of proline, glutamate and alpha-ketoglutarate ( $\alpha$ -KG) from  $U$ - $^{13}C$ -proline after 24hrs at the indicated conditions in normoxia (21%  $O_2$ ) and hypoxia (1%  $O_2$ ). All data are presented as mean  $\pm$  SEM.  $n=3$  replicates per condition. M0 represents unlabelled molecules with each increasing number representing additional  $^{13}C$ -labelled carbons. (b) Fractional labelling of proline, glutamine and TCA intermediate from  $U$ - $^{13}C$ -proline after 24hrs at 5mM glucose (left charts) or 0.5mM glutamine (right charts) with or without DHP 1mM. All data presented as mean  $\pm$  SEM.  $n=3$  replicates per condition.

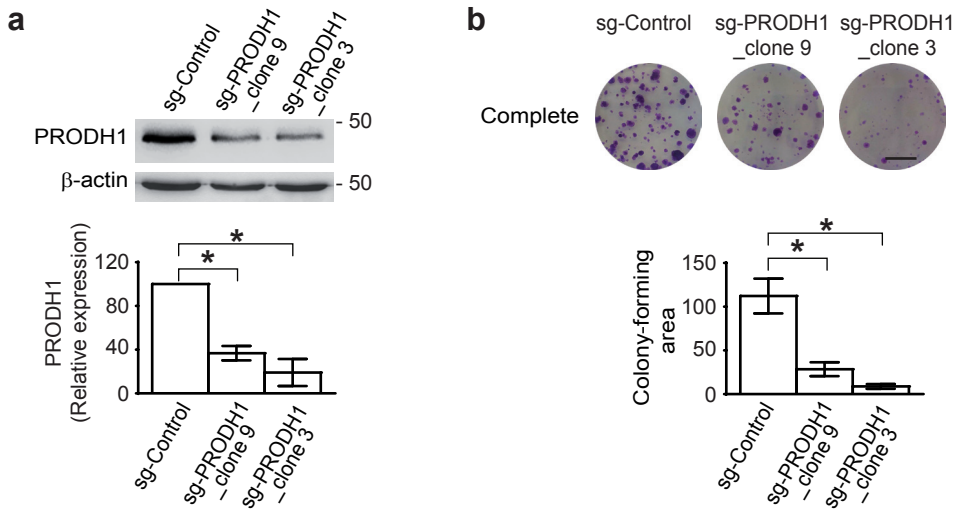

### Supplementary Figure 9

**Prod1 gene-editing in PK4A cells using the CRISPR-Cas9 system.** (a) Illustration and quantification (upper and lower panels, respectively) of PROD1 levels in sg-Control and sg-PROD1\_clone9 and \_clone3 PK4A cells revealed by western blot analysis (marker size indicated in kDa). Protein levels in each cell line are normalised to  $\beta$ -actin. Data are expressed as mean  $\pm$  SEM (n=2 independent experiments). Uncropped images of blots are shown in supplementary Fig. 10. \* p<0.05, two-tailed unpaired Student's t-test. (b) Representative clonogenic assay (upper panel) and quantification of sg-Control and sg-PROD1\_clone 9 and \_clone 3 PK4A cells colony-forming area (lower panel) in complete media. Data are mean  $\pm$  SEM (n=3 independent experiments). \* p<0.05, two-tailed unpaired Student's t-test. Scale bar: 5 mm

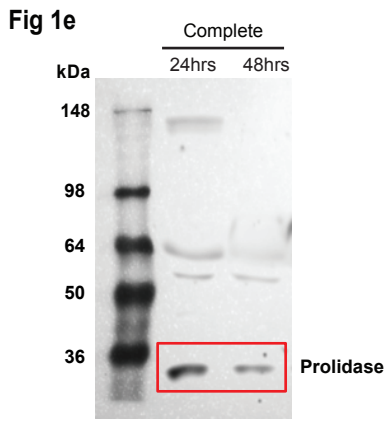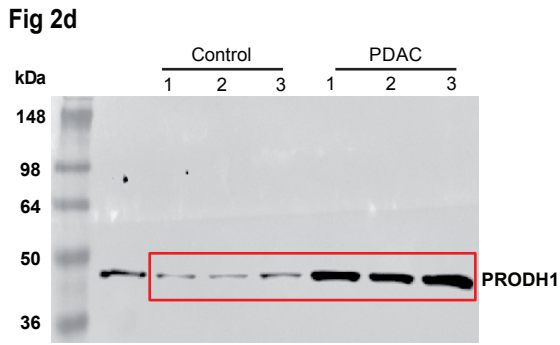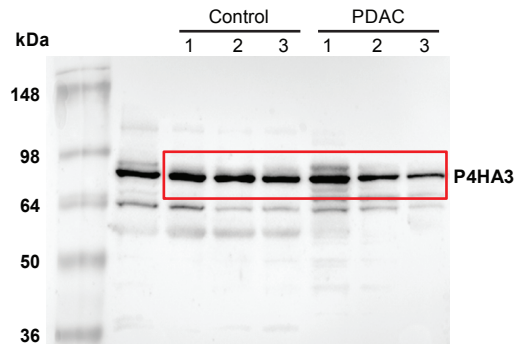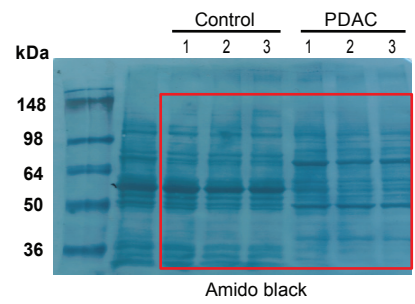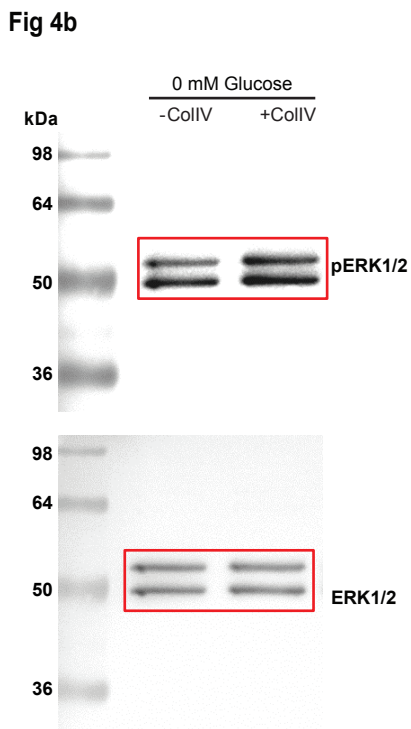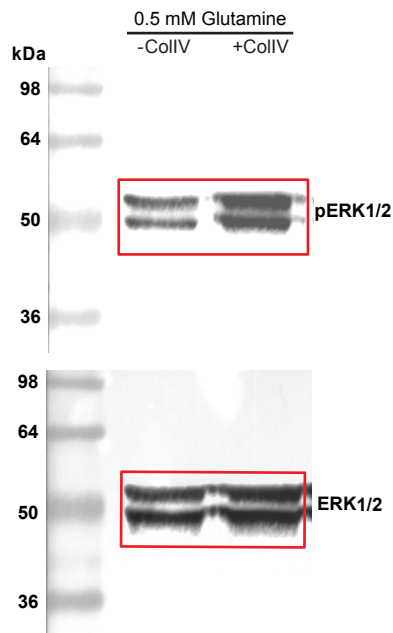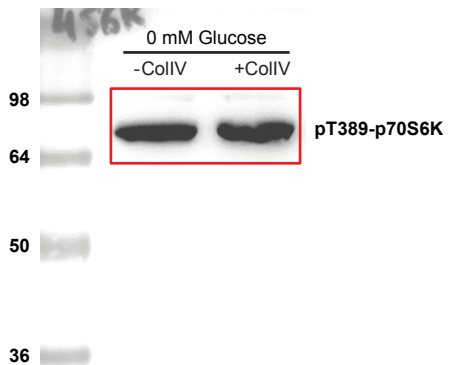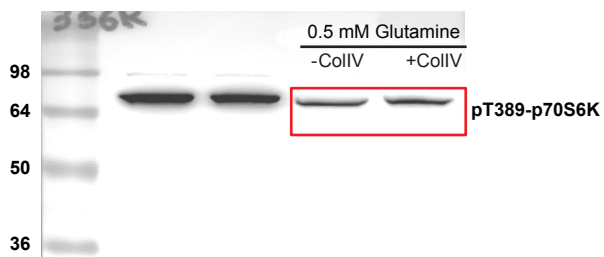

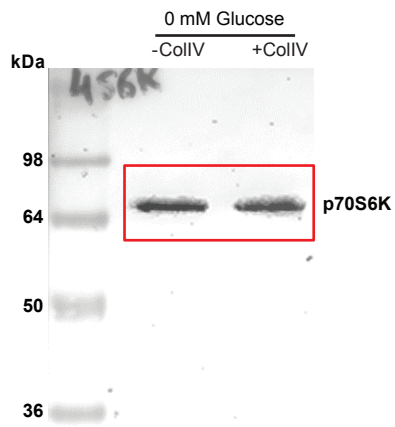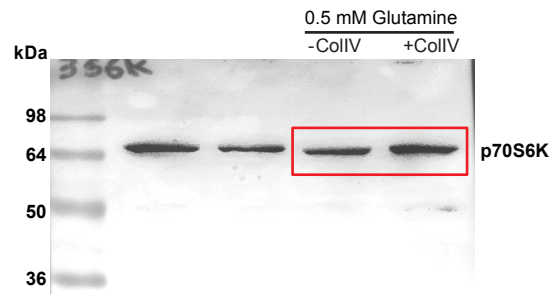

Fig 4c

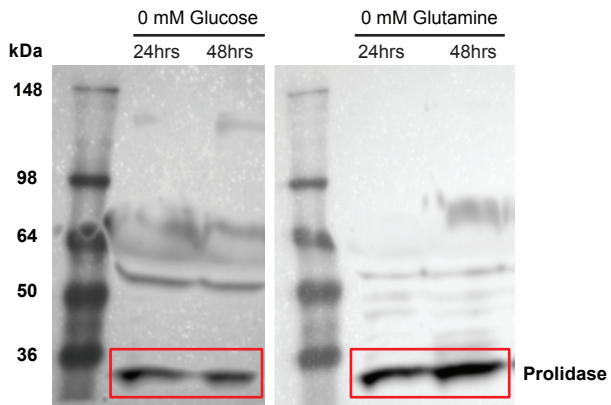

Supp. Fig 3b

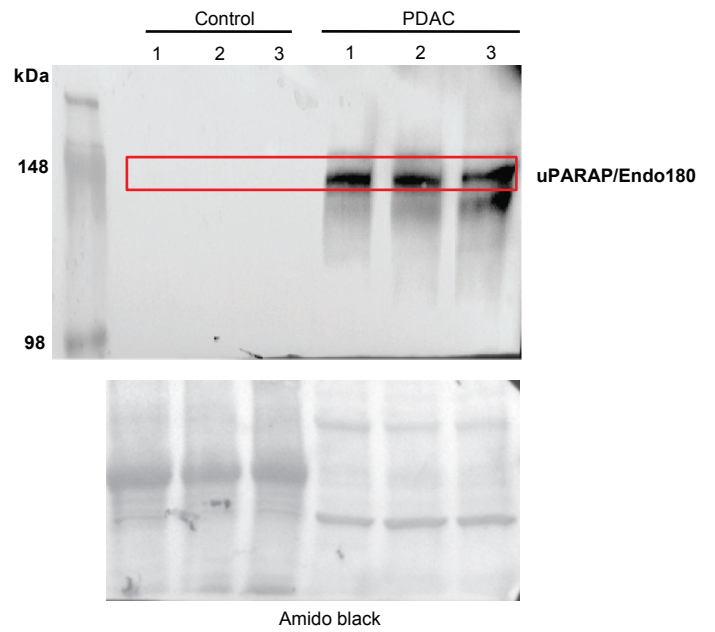

Supp. Fig 9a

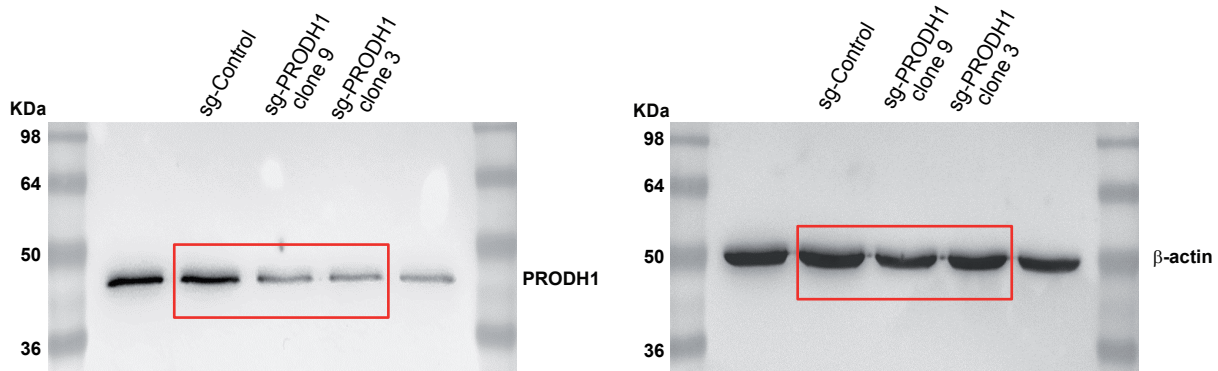



**Supplementary Table 1. Primer sequences (*mus musculus*) used to determine transcript expression profiles by real-time PCR**

| Gene name      | Forward primer (5'-->3') | Reverse primer (5'-->3') | RefSeq mRNA |
|----------------|--------------------------|--------------------------|-------------|
| <i>pepd</i>    | GGGAAAGATCCATTCCAAGG     | CACTGCCACTGTCTGTGTG      | NM_008820.2 |
| <i>mmp2</i>    | CCAGATCACATACAGGATCATT   | CCATCATGGATTTCGAGAAAA    | NM_008610.2 |
| <i>mmp9</i>    | CAGCTGGCAGAGGCATACTT     | TTCTGAAGCATCAGCAAAGC     | NM_013599.3 |
| <i>mmp13</i>   | GGGACTAAAGAACATGGTGACT   | AGCCTTTGGAAGTCTGTGTC     | NM_008607.2 |
| <i>36b4</i>    | GCTGATGGCAAGAACACCA      | CCCAAAGCCTGGAAGAAGGA     | NM_007475.5 |
| <i>endo180</i> | GCCCCATCAAGAGTAACGAC     | CGTGATACTCAGCAAGTCTGC    | NM_008626.3 |

**Supplementary Table 2. Amino Acid Fragments Used for Isotope Quantification**

| Metabolite          | Carbons <sup>a</sup> | Formula <sup>b</sup>                                                          | Mass (m/z) |
|---------------------|----------------------|-------------------------------------------------------------------------------|------------|
| <b>αKG</b>          | 12345                | C <sub>14</sub> H <sub>28</sub> O <sub>5</sub> NSi <sub>2</sub>               | 346        |
| <b>Ala</b>          | 23                   | C <sub>10</sub> H <sub>26</sub> ONSi <sub>2</sub>                             | 232        |
| <b>Ala</b>          | 123                  | C <sub>11</sub> H <sub>26</sub> O <sub>2</sub> NSi <sub>2</sub>               | 260        |
| <b>Arg</b>          | 23456                | C <sub>17</sub> H <sub>38</sub> N <sub>3</sub> Si <sub>2</sub>                | 340        |
| <b>Arg</b>          | 123456               | C <sub>20</sub> H <sub>44</sub> O <sub>2</sub> N <sub>3</sub> Si <sub>3</sub> | 442        |
| <b>Asp</b>          | 12                   | C <sub>14</sub> H <sub>32</sub> O <sub>2</sub> NSi <sub>2</sub>               | 302        |
| <b>Asp</b>          | 234                  | C <sub>17</sub> H <sub>40</sub> O <sub>3</sub> NSi <sub>3</sub>               | 390        |
| <b>Asp</b>          | 1234                 | C <sub>18</sub> H <sub>40</sub> O <sub>4</sub> NSi <sub>3</sub>               | 418        |
| <b>Cit</b>          | 123456               | C <sub>20</sub> H <sub>39</sub> O <sub>6</sub> Si <sub>3</sub>                | 459        |
| <b>Cit</b>          | 123456               | C <sub>26</sub> H <sub>55</sub> O <sub>7</sub> Si <sub>4</sub>                | 591        |
| <b>Fum</b>          | 1234                 | C <sub>12</sub> H <sub>23</sub> O <sub>4</sub> NSi <sub>2</sub>               | 287        |
| <b>Gln</b>          | 12345                | C <sub>19</sub> H <sub>43</sub> O <sub>3</sub> N <sub>2</sub> Si <sub>3</sub> | 431        |
| <b>Glu</b>          | 2345                 | C <sub>16</sub> H <sub>36</sub> O <sub>2</sub> NSi <sub>2</sub>               | 330        |
| <b>Glu</b>          | 12345                | C <sub>19</sub> H <sub>42</sub> O <sub>4</sub> NSi <sub>3</sub>               | 432        |
| <b>Gly</b>          | 2                    | C <sub>9</sub> H <sub>24</sub> ONSi <sub>2</sub>                              | 218        |
| <b>Gly</b>          | 12                   | C <sub>10</sub> H <sub>24</sub> O <sub>2</sub> NSi <sub>2</sub>               | 246        |
| <b>Ile</b>          | 23456                | C <sub>11</sub> H <sub>26</sub> NSi                                           | 200        |
| <b>Ile</b>          | 23456                | C <sub>13</sub> H <sub>32</sub> ONSi <sub>2</sub>                             | 274        |
| <b>Ile</b>          | 123456               | C <sub>14</sub> H <sub>32</sub> O <sub>2</sub> NSi <sub>2</sub>               | 302        |
| <b>Lac</b>          | 123                  | C <sub>11</sub> H <sub>25</sub> O <sub>3</sub> Si <sub>2</sub>                | 261        |
| <b>Leu</b>          | 23456                | C <sub>11</sub> H <sub>26</sub> NSi                                           | 200        |
| <b>Leu</b>          | 23456                | C <sub>13</sub> H <sub>32</sub> ONSi <sub>2</sub>                             | 274        |
| <b>Leu</b>          | 123456               | C <sub>14</sub> H <sub>32</sub> O <sub>2</sub> NSi <sub>2</sub>               | 302        |
| <b>Lys</b>          | 23456                | C <sub>17</sub> H <sub>41</sub> N <sub>2</sub> Si <sub>2</sub>                | 329        |
| <b>Lys</b>          | 123456               | C <sub>20</sub> H <sub>47</sub> O <sub>2</sub> N <sub>2</sub> Si <sub>3</sub> | 431        |
| <b>Mal</b>          | 1234                 | C <sub>18</sub> H <sub>39</sub> O <sub>5</sub> Si <sub>3</sub>                | 419        |
| <b>Met</b>          | 2345                 | C <sub>10</sub> H <sub>24</sub> NSiS                                          | 218        |
| <b>Met</b>          | 2345                 | C <sub>12</sub> H <sub>30</sub> ONSi <sub>2</sub> S                           | 292        |
| <b>Met</b>          | 12345                | C <sub>13</sub> H <sub>30</sub> O <sub>2</sub> NSi <sub>2</sub> S             | 320        |
| <b>Phe</b>          | 23456789             | C <sub>14</sub> H <sub>24</sub> NSi                                           | 234        |
| <b>Phe</b>          | 23456789             | C <sub>14</sub> H <sub>32</sub> O <sub>2</sub> NSi <sub>2</sub>               | 308        |
| <b>Phe</b>          | 123456789            | C <sub>17</sub> H <sub>30</sub> O <sub>2</sub> NSi <sub>2</sub>               | 336        |
| <b>Pro</b>          | 12345                | C <sub>16</sub> H <sub>36</sub> O <sub>2</sub> NSi <sub>2</sub>               | 330        |
| <b>(Hydroxy)Pro</b> | 12345                | C <sub>19</sub> H <sub>45</sub> O <sub>3</sub> NSi <sub>3</sub>               | 416        |
| <b>Pyr</b>          | 123                  | C <sub>6</sub> H <sub>12</sub> O <sub>3</sub> NSi                             | 174        |
| <b>Suc</b>          | 1234                 | C <sub>12</sub> H <sub>25</sub> O <sub>4</sub> Si <sub>2</sub>                | 289        |
| <b>Ser</b>          | 23                   | C <sub>14</sub> H <sub>34</sub> ONSi <sub>2</sub>                             | 288        |
| <b>Ser</b>          | 12                   | C <sub>14</sub> H <sub>32</sub> O <sub>2</sub> NSi <sub>2</sub>               | 302        |
| <b>Ser</b>          | 23                   | C <sub>16</sub> H <sub>40</sub> O <sub>2</sub> NSi <sub>3</sub>               | 362        |

|            |          |                        |     |
|------------|----------|------------------------|-----|
| <b>Ser</b> | 123      | $C_{17}H_{40}O_3NSi_3$ | 390 |
| <b>Thr</b> | 234      | $C_{17}H_{42}O_2NSi_3$ | 376 |
| <b>Thr</b> | 1234     | $C_{18}H_{42}O_3NSi_3$ | 404 |
| <b>Tyr</b> | 23456789 | $C_{20}H_{38}ONSi_2$   | 364 |
| <b>Val</b> | 2345     | $C_{12}H_{30}ONSi_2$   | 260 |
| <b>Val</b> | 12345    | $C_{13}H_{30}O_2NSi_2$ | 288 |

a = "Carbons" indicates the carbons present in the derivative that is measured via GC-MS.

b = chemical formula of the derivative measured via GC-MS (derivatization process described in the method section)
